Research Article

# Meta-analysis of the relationship between methylenetetrahydrofolate reductase C677T and A1298C polymorphism and venous thromboembolism in the Caucasian and Asian

Miao Gao<sup>1,\*</sup>, Na Feng<sup>1,\*</sup>, Meixia Zhang<sup>2,3</sup>, Xinyu Ti<sup>1</sup> and  Xiuping Zuo<sup>1</sup>

<sup>1</sup>The First Affiliated Hospital of Air Force Medical University (XiJing Hospital), Respiratory and Critical Care Medicine, Xi'an, Shaanxi 710032, P.R. China; <sup>2</sup>School of Life Science and Technology, Xi'an Jiaotong University, No.28, Xianning West Road, Xi'an, Shaanxi 710049, P.R. China; <sup>3</sup>The First Affiliated Hospital of Air Force Medical University (XiJing Hospital), Department of Nursing, Xi'an, Shaanxi 710032, P.R.China

**Correspondence:** Xiuping Zuo (362185206@qq.com) or Xinyu Ti (tixinyu@fmmu.edu.cn)

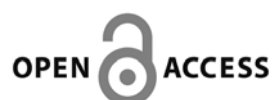

Recent years, it is a highly debated topic that whether methylenetetrahydrofolate reductase (MTHFR) C677T polymorphism and A1298C polymorphism could increase susceptibility to venous thromboembolism (VTE) in the Asian and Caucasian. Therefore, we expect to settle that controversy evidentially. Basic methods: Electronic databases (Pubmed, embase, Cochrane library, scopus, OvidSP, Wiley Online library, Springer link, EBSCO, Elsevier Science Direct, Google scholar) without date limitation were searched. Crude odds ratio (OR) along with 95% confidence interval (95% CI) was calculated to assess the association quantitatively. Finally, a total of 37 eligible studies were included, containing 31 for MTHFR C677T polymorphism and 6 for MTHFR A1298C polymorphism. The pooled results suggested that MTHFR C677T mutation may increase susceptibility to VTE in reverse recessive model (CC+CT vs TT): OR = 0.68 (0.56, 0.83), reverse dominant model (CC vs CT +TT): OR = 0.82 (0.72, 0.94), heterozygote model (CT vs TT): OR = 0.65 (0.52, 0.81), homozygote model (CC vs TT): OR = 0.73 (0.60, 0.89) and allele model (C vs T): OR = 0.80 (0.71, 0.90). Subgroup analysis about Asian also support that results, but Caucasian group not. In addition, MTHFR A1298C polymorphism may be not related to VTE in all genetic model. The results of meta-analysis indicated that MTHFR C677T polymorphism might increase the risk of VTE, especially in Asian population.

## Introduction

Venous thromboembolism (VTE) is a common clinical vascular syndrome, consisting of deep vein thrombosis (DVT) and pulmonary embolism (PE), which are two different forms of the same disease [1] At present, venous thrombosis has become the third cause of cardiovascular disease and common complications of cancer, such as lung cancer [2]. VTE is a complex multi-factor disease, in which gene mutation plays an important role [3]. However, there are great ethnic and regional characteristics of gene mutation in VTE. Therefore, exploring the susceptible genes to provide the basis for the prevention and treatment of VTE will be one of the important research directions of comprehensive therapy for vascular diseases and cancer.

Methylenetetrahydrofolate reductase (MTHFR) is a homocysteine (Hey) metabolic regulatory enzyme. It could reduce N5, N10-methylene tetrahydro folic acid to N5- methyl tetrahydro folic acid, and the latter has the ability to maintain the stability of plasma Hey. The decrease of MTHFR activity will give rise to impaired Hey methylation and further hyperhomocysteinemia, which could destroy vascular endothelium

\*These authors have contributed equally to this work.

Received: 04 April 2020  
Revised: 19 May 2020  
Accepted: 18 June 2020

Accepted Manuscript online:  
02 July 2020  
Version of Record published:  
10 July 2020

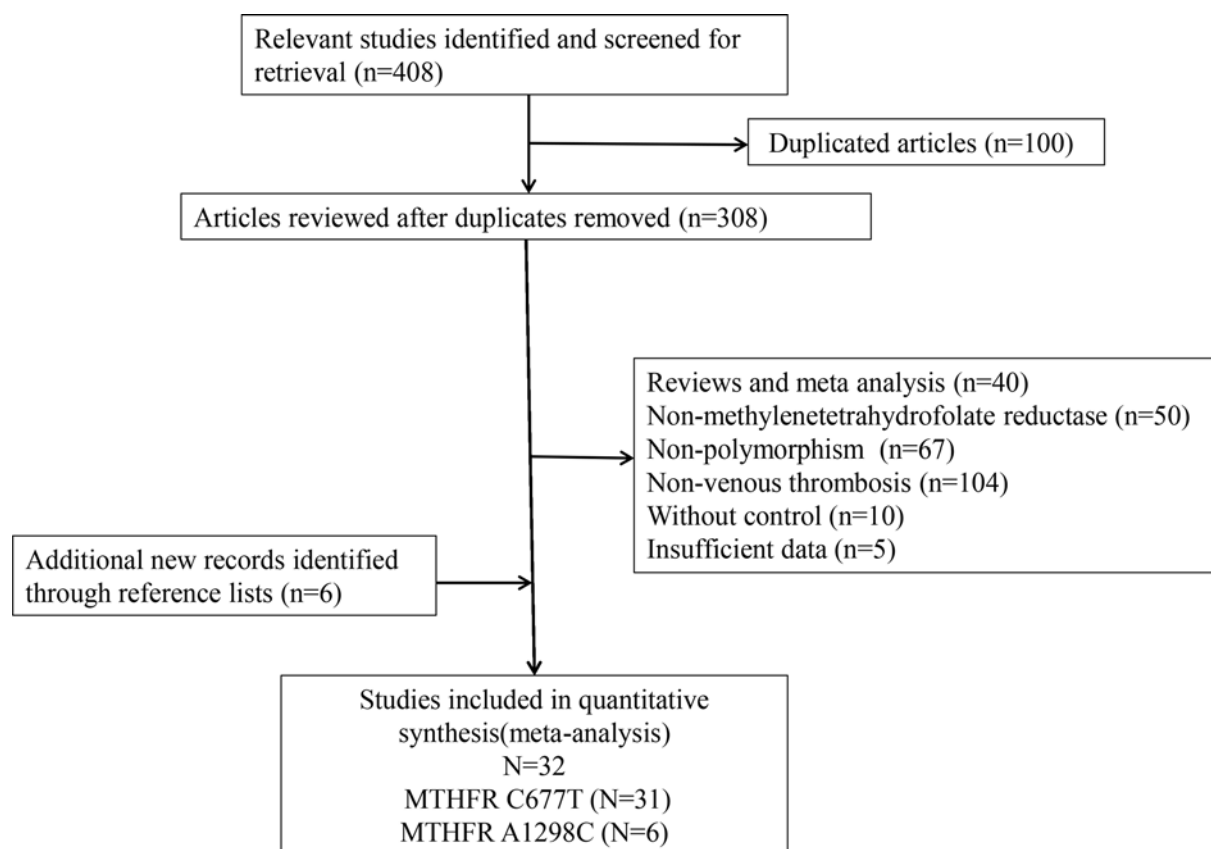

**Figure 1.** Flow diagram for literature selection

and change platelet function as well as blood coagulation state, finally participating in the pathogenesis of VTE. Both the mutation of MTHFR gene at 677site from base cytosine (C) to thymine (T) and the mutation of MTHFR gene at 1298site from adenine (A) to cytosine (C) could cause amino acid mistranslation, further decrease MTHFR activity and increase Hey level.

In recent years, many studies about the relationship between MTHFR gene polymorphism and the risk of VTE have been reported, but with inconsistent conclusions. Some hold the view that MTHFR/C677T was a significant risk factor of VTE, which demonstrates the association of MTHFR C677T polymorphism with the susceptibility to VTE [4], but some not [5]. In addition to MTHFR C677T polymorphism, it is also a highly debated issue that whether MTHFR A1298C polymorphism could increase the susceptibility to VTE. Therefore, we conducted this meta-analysis to explore the correlation between MTHFR C677T polymorphism as well as MTHFR A1298C polymorphism and the risk of VTE, providing theoretical basis for the prevention and treatment of VTE.

## Materials and methods

### Search strategy and selection criteria

This systematic review and meta-analysis is reported in accordance with the Preferred Items for Systematic Reviews and Meta-analysis (PRISMA) Statement. Literature was retrieved by formal search of electronic databases (Pubmed, embase, Cochrane library, scopus, OvidSP, Wiley Online library, Springer link, EBSCO, Elsevier Science Direct, Google scholar) without date limitation. To achieve the maximum sensitivity of the search strategy, we used appropriated free text and thesaurus terms including “methylenetetrahydrofolate reductase or MTHFR”, “Venous thromboembolism or VTE”, “polymorphism or mutation or variant”. We also search reference lists of related articles by hand to obtain more studies. The retrieval strategy of Pubmed is as follows: (((((polymorphism[Title/Abstract] OR mutation[Title/Abstract] OR variant[Title/Abstract])) OR “Polymorphism, Genetic”[Mesh])) AND ((deep venous thrombosis[Title/Abstract] OR “Venous thromboembolism”[Mesh])) AND

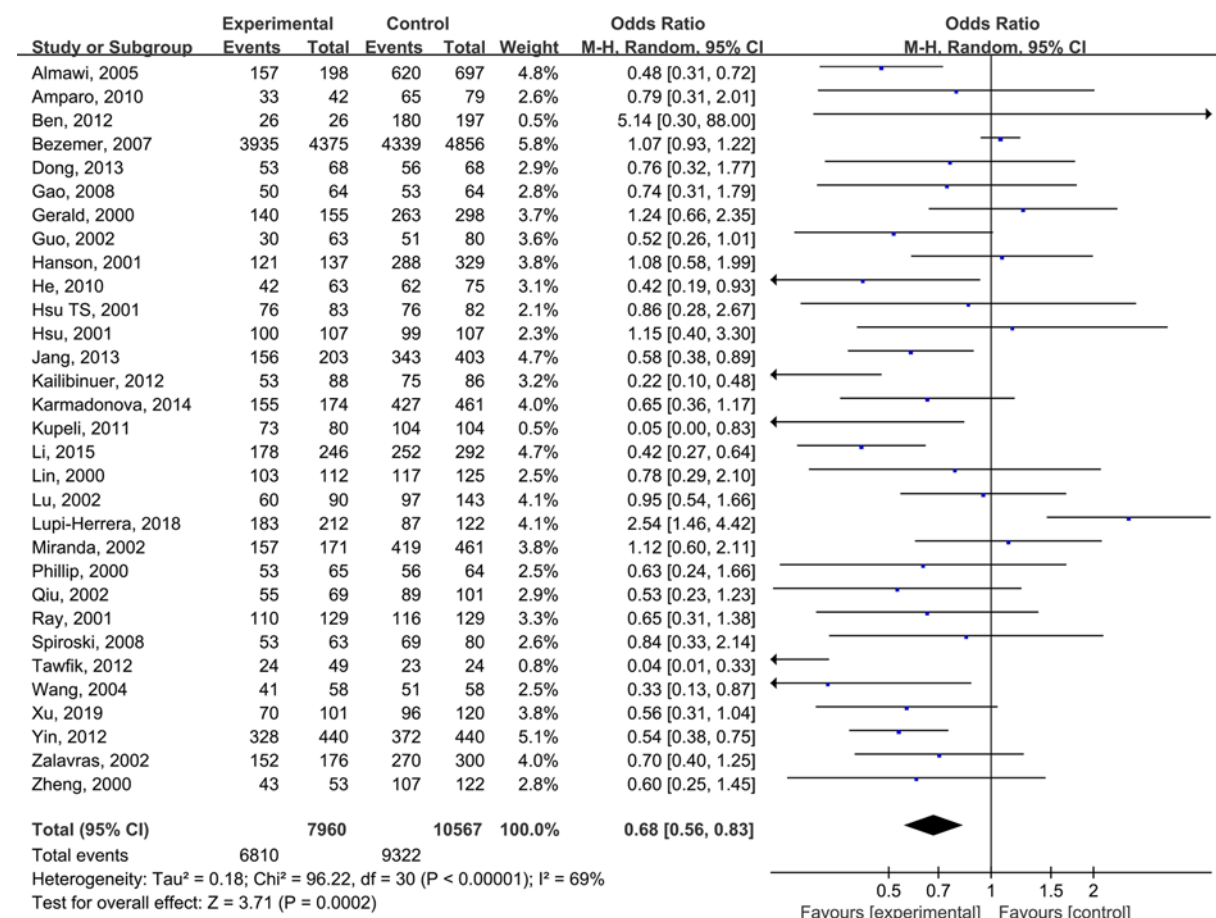

**Figure 2. MTHFR C677T polymorphism and the susceptibility to Venous thromboembolism (CC+CT vs TT)**

((Methylenetetrahydrofolate Reductase (NADPH) or Methylene-THF Reductase (NADPH) or Methylenetetrahydrofolate Reductase or 5,10-Methylenetetrahydrofolate Reductase (NADPH) or Methylene Tetrahydrofolate Reductase or Tetrahydrofolate Reductase, Methylene)) OR “Methylenetetrahydrofolate Reductase (NADPH2)”[Mesh]).

Inclusion criteria: (1) Patients with VTE, including venous thrombosis and deep venous thrombosis; (2) Methylenetetrahydrofolate reductase C677T polymorphism and A1298C polymorphism; (3) Sufficient genotype data; (4)  $P$  value for Hardy–Weinberg equilibrium test  $> 0.05$ ; (5) Case–control design.

## Data extraction and quality assessment

Two authors independently extracted the original data. As recommended by the Cochrane Non-Randomized Studies Methods, Newcastle–Ottaw scale (NOS) was used to assess the quality of included researches and a total score of included studies ranging from 7 to 9 was deemed high quality. Disagreement was resolved by discussion. The extracted data were consisted of the follow items: the first author’s name, publication year, country, race, genotype distribution data, total number of cases and controls.

## Statistical analysis

Meta-analysis was performed to calculate pooled ORs (Odds ratios) with 95% CI (Confidence interval) by using Review manager 5.3. Heterogeneity among studies was assessed by  $I^2$  statistic.  $I^2 > 50\%$  is indicative of heterogeneity [6], random effects model will be used. Otherwise, fixed effect will be implemented. Chi-square distribution was employed to measure the deviation of genotype distribution from Hardy–Weinberg equilibrium in control group. Subgroup analysis was conducted to explore the sources of heterogeneity and the differences between races. We also perform sensitive analysis by changing effect models. Finally, funnel plots were carried out to evaluate publication bias. The  $P$ -value  $< 0.05$  in all tests was considered significant.

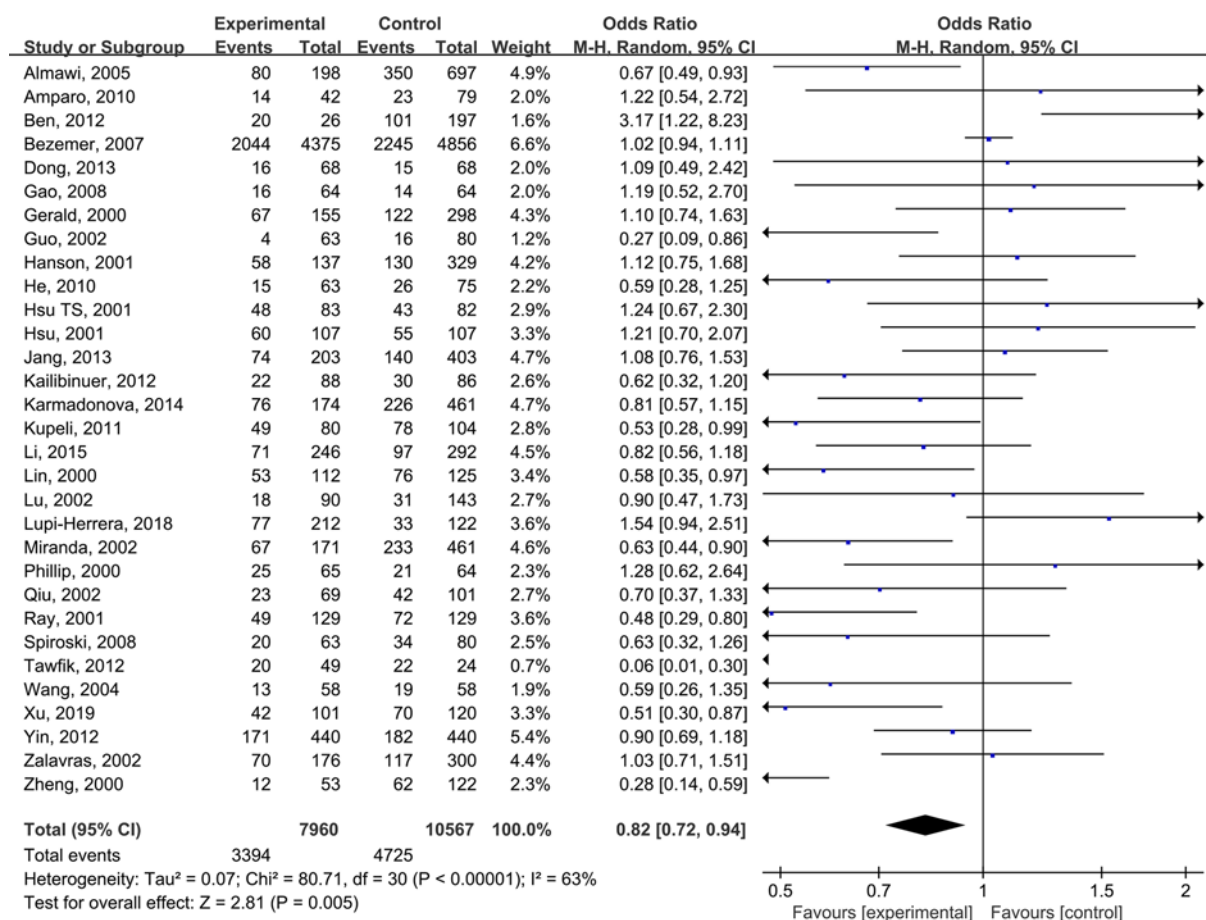

**Figure 3. MTHFR C677T polymorphism and the susceptibility to Venous thromboembolism (CC vs CT+TT)**

## Results

### Flowchart and characteristic of including studies

There are 32 eligible studies meeting to our inclusion criteria [4,5,7–36], including 31 papers for MTHFR C677T polymorphism [4,5,7–25,27–36] and 6 papers for MTHFR A1298C polymorphism [12,15,19,21,26,30]. The details of flow diagram for literature selection were shown in Figure 1. Among included studies, a total of 15 for the Asian [5,8,9,11,13,14,17,18,21–24,27,34,36], mainly in China, and 17 for the Caucasian [4,7,10,12,15,16,19,20,25,26,28–33,35]. Due to the comprehensive search, the publication year is from 1999 to 2019. The total sample size is nearly 20,000, containing 8223 patients and 10,859 controls. The main features of eligible studies are summarized in Tables 1 and 2.

## Meta-analysis results

### MTHFR C677T polymorphism and the susceptibility to Venous thromboembolism

The pooled results suggested that there were significant differences in all models of MTHFR C677T polymorphism, including CC+CT vs TT: OR = 0.68 (0.56, 0.83) (Figure 2), CC vs CT +TT: OR = 0.82 (0.72, 0.94) (Figure 3), CT vs TT: OR = 0.65 (0.52, 0.81) (Figure 4), CC vs TT: OR = 0.73 (0.60, 0.89) (Figure 5) and C vs T: OR = 0.80 (0.71, 0.90) (Figure 6). Due to significant heterogeneity, random effect models were used in all the comparisons. Subgroup analysis showed that, for the Asian, there was no heterogeneity in all the comparisons. But for the Caucasian, no significant association was observed, which tells us the source of heterogeneity and the difference between races (Table 3). Table 4 detailed the results of sensitive analysis, which demonstrated no significant change appeared in all pooled results after the transformation of random effect models into fixed effect models. The funnel plots showed good symmetry bias in all comparisons.



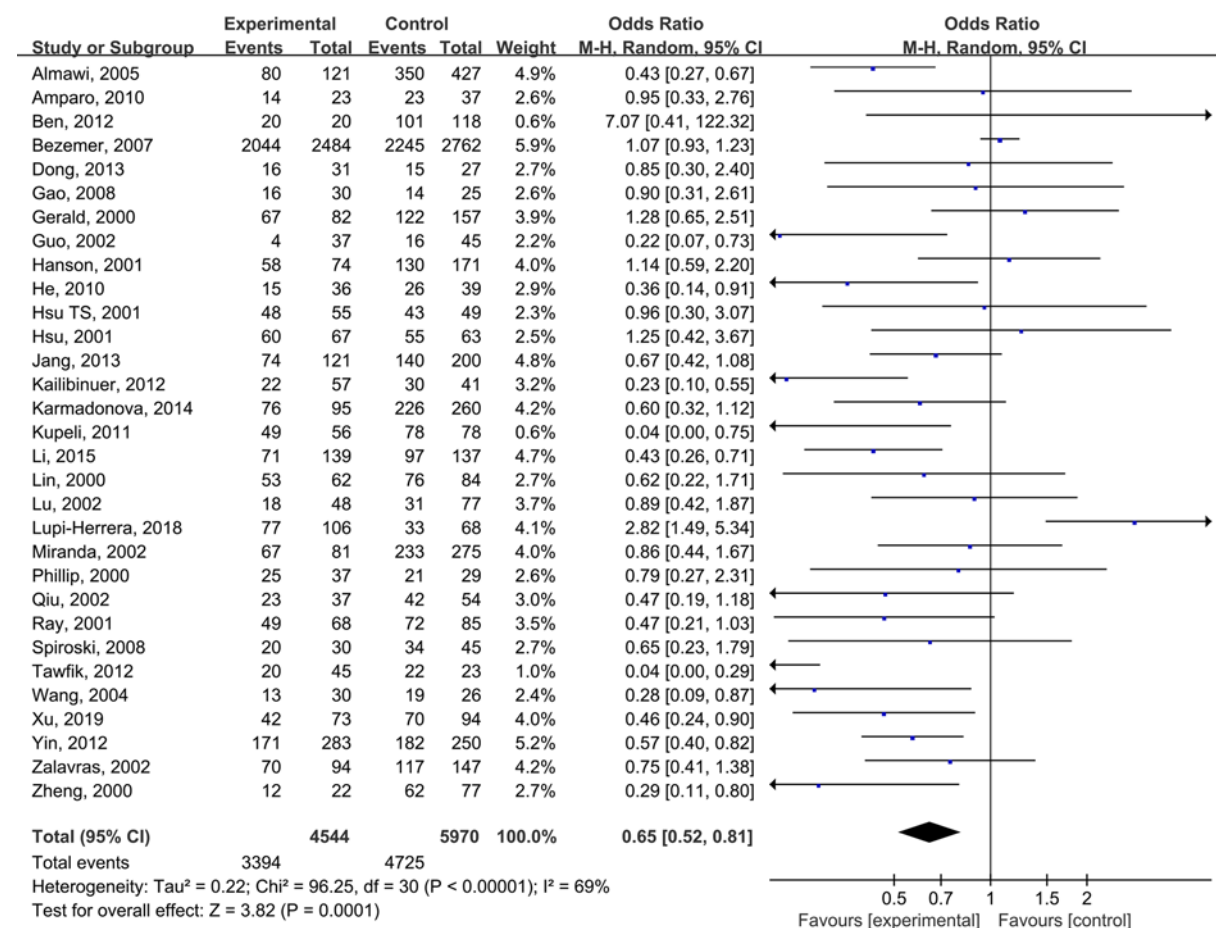

Figure 4. MTHFR C677T polymorphism and the susceptibility to Venous thromboembolism (CT vs TT)

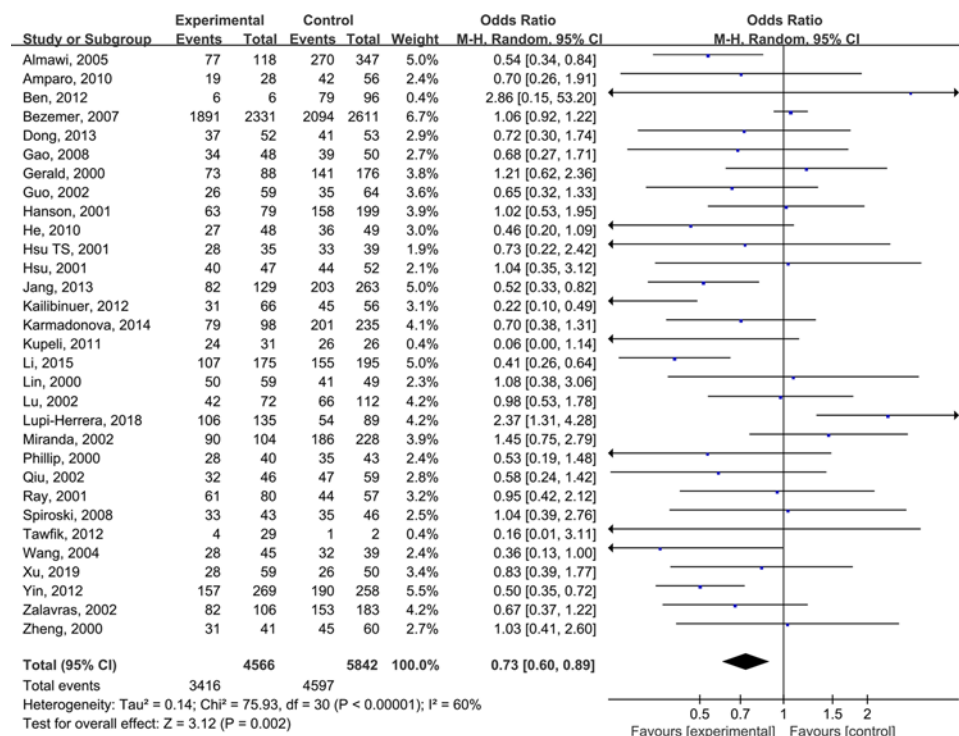

Figure 5. MTHFR C677T polymorphism and the susceptibility to Venous thromboembolism (CC vs TT)

**Table 1** Characteristics of include studies about MTHFR C677T polymorphism

| Author, year       | Country     | Race      | Case group |      |     |       | Control group |      |     |       | pHWE | NOS |
|--------------------|-------------|-----------|------------|------|-----|-------|---------------|------|-----|-------|------|-----|
|                    |             |           | CC         | CT   | TT  | Total | CC            | CT   | TT  | Total |      |     |
| Jang, 2013         | South Korea | Asian     | 74         | 82   | 47  | 203   | 140           | 203  | 60  | 403   | 0.62 | 8   |
| Xu, 2019           | China       | Asian     | 42         | 28   | 31  | 101   | 70            | 26   | 24  | 120   | 0.10 | 8   |
| Yin, 2012          | China       | Asian     | 171        | 157  | 112 | 440   | 182           | 190  | 68  | 440   | 0.30 | 7   |
| Kallibinuer, 2012  | China       | Asian     | 22         | 31   | 35  | 88    | 30            | 45   | 11  | 86    | 0.65 | 7   |
| Wang, 2004         | China       | Asian     | 13         | 28   | 17  | 58    | 19            | 32   | 7   | 58    | 0.51 | 7   |
| Qiu, 2002          | China       | Asian     | 23         | 32   | 14  | 69    | 42            | 47   | 12  | 101   | 0.98 | 7   |
| Hsu, 2001          | China       | Asian     | 60         | 40   | 7   | 107   | 55            | 44   | 8   | 107   | 0.98 | 8   |
| Lu, 2002           | China       | Asian     | 18         | 42   | 30  | 90    | 31            | 66   | 46  | 143   | 0.73 | 8   |
| Guo, 2002          | China       | Asian     | 4          | 26   | 33  | 63    | 16            | 35   | 29  | 80    | 0.66 | 7   |
| Zheng, 2000        | China       | Asian     | 12         | 31   | 10  | 53    | 62            | 45   | 15  | 122   | 0.34 | 8   |
| Lin, 2000          | China       | Asian     | 53         | 50   | 9   | 112   | 76            | 41   | 8   | 125   | 0.75 | 7   |
| He, 2010           | China       | Asian     | 15         | 27   | 21  | 63    | 26            | 36   | 13  | 75    | 1.00 | 7   |
| Li, 2015           | China       | Asian     | 71         | 107  | 68  | 246   | 97            | 155  | 40  | 292   | 0.21 | 8   |
| Gao, 2008          | China       | Asian     | 16         | 34   | 14  | 64    | 14            | 39   | 11  | 64    | 0.21 | 7   |
| Dong, 2013         | China       | Asian     | 16         | 37   | 15  | 68    | 15            | 41   | 12  | 68    | 0.23 | 8   |
| Hsu TS, 2001       | China       | Asian     | 48         | 28   | 7   | 83    | 43            | 33   | 6   | 82    | 1.00 | 8   |
| Karmadonova, 2014  | Russia      | Caucasian | 76         | 79   | 19  | 174   | 226           | 201  | 34  | 461   | 0.50 | 7   |
| Spiroski, 2008     | Macedonia   | Caucasian | 20         | 33   | 10  | 63    | 34            | 35   | 11  | 80    | 0.92 | 7   |
| Bezemer, 2007      | Netherlands | Caucasian | 2044       | 1891 | 440 | 4375  | 2245          | 2094 | 517 | 4856  | 0.68 | 8   |
| Almawi, 2005       | America     | Caucasian | 80         | 77   | 41  | 198   | 350           | 270  | 77  | 697   | 0.08 | 7   |
| Miranda, 2002      | Netherlands | Caucasian | 67         | 90   | 14  | 171   | 233           | 186  | 42  | 461   | 0.86 | 6   |
| Zalavras, 2002     | Greece      | Caucasian | 70         | 82   | 24  | 176   | 117           | 153  | 30  | 300   | 0.14 | 7   |
| Amparo, 2010       | Spain       | Caucasian | 14         | 19   | 9   | 42    | 23            | 42   | 14  | 79    | 0.79 | 7   |
| Tawfik, 2012       | Egypt       | Caucasian | 20         | 4    | 25  | 49    | 22            | 1    | 1   | 24    | 0.01 | 7   |
| Hanson, 2001       | America     | Caucasian | 58         | 63   | 16  | 137   | 130           | 158  | 41  | 329   | 0.80 | 7   |
| Ray, 2001          | Canada      | Caucasian | 49         | 61   | 19  | 129   | 72            | 44   | 13  | 129   | 0.30 | 6   |
| Gerald, 2000       | Australia   | Caucasian | 67         | 73   | 15  | 155   | 122           | 141  | 35  | 298   | 0.84 | 6   |
| Phillip, 2000      | Canada      | Caucasian | 25         | 28   | 12  | 65    | 21            | 35   | 8   | 64    | 0.53 | 6   |
| Ben, 2012          | Tunisia     | Caucasian | 20         | 6    | 0   | 26    | 101           | 79   | 17  | 197   | 0.96 | 7   |
| Kupeli, 2011       | Turkey      | Caucasian | 49         | 24   | 7   | 80    | 78            | 26   | 0   | 104   | 0.35 | 8   |
| Lupi-Herrera, 2018 | Mexico      | Caucasian | 77         | 106  | 29  | 212   | 33            | 54   | 35  | 122   | 0.45 | 8   |

pHWE, *P* values for Hardy–Weinberg equilibrium test.

**Table 2** Characteristics of include studies about MTHFR A1298C polymorphism

| Author, year      | Country   | Race      | Case group |    |    |       | Control group |     |    |       | pHWE | NOS |
|-------------------|-----------|-----------|------------|----|----|-------|---------------|-----|----|-------|------|-----|
|                   |           |           | AA         | AC | CC | Total | AA            | AC  | CC | Total |      |     |
| Hanson, 2001      | America   | Caucasian | 60         | 62 | 15 | 137   | 164           | 139 | 26 | 329   | 0.90 | 8   |
| Karmadonova, 2014 | Russia    | Caucasian | 67         | 96 | 11 | 174   | 204           | 196 | 49 | 449   | 0.98 | 7   |
| Martine, 1999     | France    | Caucasian | 65         | 86 | 17 | 168   | 195           | 215 | 46 | 456   | 0.49 | 7   |
| Li, 2015          | China     | Asian     | 163        | 65 | 18 | 246   | 180           | 97  | 15 | 292   | 0.92 | 7   |
| Ray, 2001         | Canada    | Caucasian | 68         | 49 | 12 | 129   | 69            | 49  | 11 | 129   | 0.86 | 8   |
| Spiroski, 2008    | Macedonia | Caucasian | 32         | 29 | 2  | 63    | 38            | 39  | 3  | 80    | 0.18 | 8   |

pHWE, *P* values for Hardy–Weinberg equilibrium test.

## MTHFR A1298C polymorphism and the susceptibility to VTE

Similar to C677T polymorphism, the comparisons of five models were conducted. As shown in Figure 7, none of any comparison exhibited significant difference statistically, with AA+AC vs CC: OR = 0.97 (0.71, 1.32) (Figure 7A), AA vs AC +CC: OR = 0.91 (0.77, 1.08) (Figure 7B), AA vs CC: OR = 0.90 (0.66, 1.23) (Figure 7C), AC vs CC: OR = 1.01 (0.67, 1.52) (Figure 7D) and A vs C: OR = 0.95 (0.83, 1.07) (Figure 7E). Because of none heterogeneity, fixed

**Table 3 Subgroup analysis of the relationship between MTHFR C677T polymorphism and the susceptibility to VTE**

| Comparison  | Group     | OR (95%CI)        | $I^2$ , P    |
|-------------|-----------|-------------------|--------------|
| CC+CT vs TT | Total     | 0.68 (0.56, 0.83) | 69%, <0.0001 |
|             | Asian     | 0.54 (0.46, 0.65) | 10%, 0.34    |
|             | Caucasian | 0.85 (0.63, 1.14) | 69%, <0.0001 |
| CC vs CT+TT | Total     | 0.82 (0.74, 0.93) | 62%, <0.0001 |
|             | Asian     | 0.79 (0.66, 0.95) | 38%, 0.06    |
|             | Caucasian | 0.88 (0.72, 1.07) | 71%, <0.0001 |
| CC vs TT    | Total     | 0.65 (0.52, 0.81) | 69%, <0.0001 |
|             | Asian     | 0.52 (0.42, 0.65) | 19%, 0.24    |
|             | Caucasian | 0.81 (0.58, 1.12) | 72%, <0.0001 |
| CT vs TT    | Total     | 0.73 (0.60, 0.89) | 61%, <0.0001 |
|             | Asian     | 0.56 (0.46, 0.68) | 13%, 0.31    |
|             | Caucasian | 0.93 (0.73, 1.19) | 50%, 0.01    |
| C vs T      | Total     | 0.80 (0.71, 0.90) | 76%, <0.0001 |
|             | Asian     | 0.74 (0.65, 0.83) | 41%, 0.04    |
|             | Caucasian | 0.88 (0.74, 1.04) | 81%, <0.0001 |

OR, odds ratio.

**Table 4 Sensitive analysis about MTHFR C677T and A1298C Polymorphism and VTE susceptibility**

| Comparison          | Effect model | OR (95%CI)        |
|---------------------|--------------|-------------------|
| <b>MTHFR C677T</b>  |              |                   |
| CC+CT vs TT         | Random       | 0.68 (0.56, 0.83) |
|                     | Fixed        | 0.80 (0.73, 0.87) |
| CC vs CT+TT         | Random       | 0.82 (0.74, 0.93) |
|                     | Fixed        | 0.92 (0.87, 0.98) |
| CC vs TT            | Random       | 0.65 (0.52, 0.81) |
|                     | Fixed        | 0.80 (0.73, 0.88) |
| CT vs TT            | Random       | 0.73 (0.60, 0.89) |
|                     | Fixed        | 0.83 (0.75, 0.91) |
| C vs T              | Random       | 0.80 (0.71, 0.90) |
|                     | Fixed        | 0.90 (0.87, 0.95) |
| <b>MTHFR A1298C</b> |              |                   |
| AA+AC vs CC         | Random       | 0.97 (0.71, 1.32) |
|                     | Fixed        | 0.99 (0.74, 1.33) |
| AA vs AC+CC         | Random       | 0.91 (0.77, 1.08) |
|                     | Fixed        | 0.91 (0.77, 1.08) |
| AA vs CC            | Random       | 0.90 (0.66, 1.23) |
|                     | Fixed        | 0.91 (0.67, 1.25) |
| AC vs CC            | Random       | 1.01 (0.67, 1.52) |
|                     | Fixed        | 1.05 (0.77, 1.43) |
| A vs C              | Random       | 0.95 (0.83, 1.07) |
|                     | Fixed        | 0.95 (0.83, 1.07) |

OR, odds ratio.

effects were adapted. Sensitive analysis also suggested our results were stable (Table 4). Publication test failed to be conducted due to small sample included.

## Discussion

Although some meta-analysis about the relationship between the risk of VTE and MTHFR mutation have been reported, but the objects are mainly limited to C677T and Chinese. We not only expanded the population, including the Asian and Caucasian, but also explored the association of A1298C polymorphism and VTE susceptibility. Our

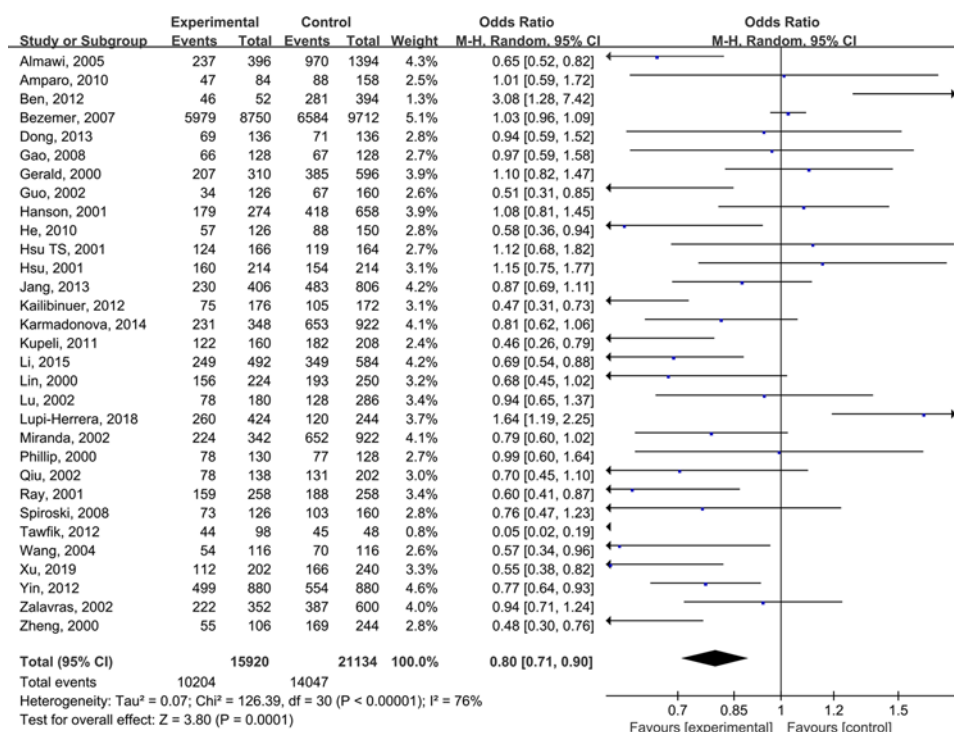

**Figure 6. MTHFR C677T polymorphism and the susceptibility to Venous thromboembolism (C vs T)**

results showed that, in all the comparisons of the gene phenotypic model, MTHFR C677T mutation could increase the risk of VTE in the Asian, but not in the Caucasian. In addition, there may be no association between MTHFR A1298C mutation and VTE susceptibility. Sensitive analysis and publication test suggested that our results were stable and reliable.

The human MTHFR gene, located on 1p36.3 and with a cDNA length of 2.2 kb, is composed of 11(12) exons and 10(11) introns. MTHFR plays a key role in folic acid metabolism. The gene sequence of MTHFR is highly conserved. If the gene sequence of 677 base cytosine C is mutated to thymine T, the valine generated by the mutation will replace the conserved alanine, which will lead to a serious decrease in the binding ability of MTHFR to flavin adenine dinucleotide [37]. The increased risk of many diseases caused by MTHFR mutation has been reported, such as congenital heart diseases [38], coronary artery disease [39], systemic lupus erythematosus [40] and cancer [41]. MTHFR's thermal stability and enzyme activity were reduced due to the mutant T allele, resulting in hyperhomocysteine, which is an independent risk factor for VTE [42].

Zhang et al. [43] reported T allele, CT genotype, and TT genotype were associated with the risk of VTE in the Chinese population. Similar to our results, a pooled study of three Asian populations also showed the TT homozygous genotype could increase and the susceptibility to VTE [17]. Den et al. [44] reported that, in non-north American populations, the mutant T allele increased the risk of VTE compared with the wild-type C allele, but not in north American populations. The reason may be that higher intake of folic acid and riboflavin in north American populations reduces the risk of high homocysteine in carriers of the mutant T allele. Our study demonstrated that, regardless of gene models, C677T mutation couldn't increase VTE susceptibility in the Caucasian.

1298 site of MTHFR is located in the exon 7 and encodes regulatory region of s-adenosine methionine. Likewise, the mutation of adenine (A) to cytosine (C) in this site causes glutamate to be replaced by alanine, decreasing the phosphorylation of serine and cysteine and thus affecting the expression of MTHFR as well [45]. As another MTHFR gene mutation, the relationship between MTHFR A1298C polymorphism and the risk of disease is also explored, such as Alzheimer's disease [46] and lung cancer [47]. Our study is the first meta-analysis to explore the relationship between MTHFR A1298C polymorphism and VTE susceptibility. Six studies were included, in which only one paper was from the Asian, so we didn't conduct subgroup analysis and publication test. Finally, no significant association was observed in any comparison of all gene models.



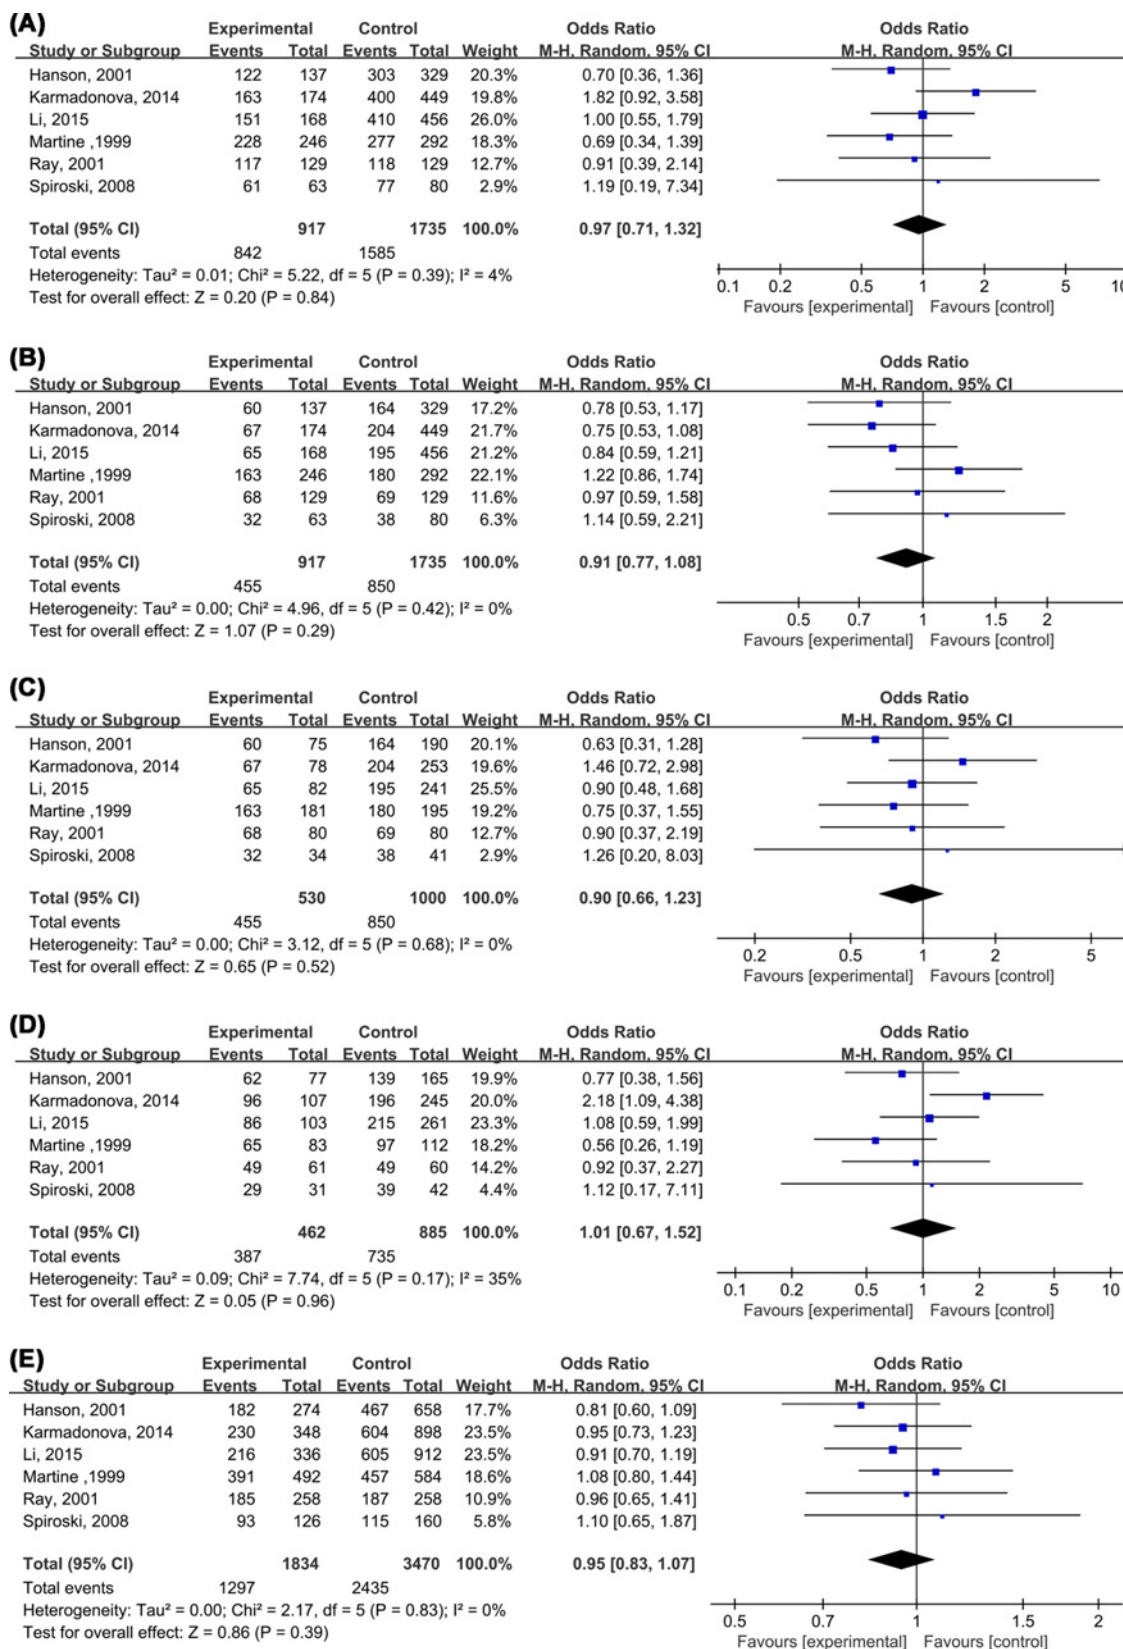

**Figure 7. MTHFR A1298C polymorphism and the susceptibility to Venous thromboembolism ((A) AA+AC vs CC, (B) AA vs AC +CC, (C) AA vs CC, (D) AC vs CC, (E) A vs C)**

Because of the comprehensive search, large samples were included. Subgroup analysis suggested race is the source of heterogeneity and there exists great difference between the Asian and Caucasian. Of course, there were some limitations we need point out. Owing to insufficient data provided, confounding factors, including age, gender, body mass index, smoking status, drink abuse and other environmental factors, are difficult to fully be adjusted. Then, the controls were not uniformly defined, such as population- and hospital-based controls, and the latter may not necessarily be representative of the underlying source population.

In conclusions, our study uncovered that MTHFR C677T polymorphism may increase susceptibility to VTE in the Asian, but not in the Caucasian. There may be no association between MTHFR A1298C polymorphism and VTE. Our conclusion requires further focus on the effect of gene–gene and gene–environment interaction as well as different VTE types.

## Competing Interests

The authors declare that there are no competing interests associated with the manuscript.

## Funding

This work was supported by Key R&D projects in social development in Shaanxi province [grant number 2017SF-003]; new technology new business of Xijing hospital [grant number XJGX15H01].

## Author Contribution

M.G. and N.F. conceived and designed the methods, extracted the original data, and drafted the manuscript. M.G., M.X.Z. and N.F. performed statistical analysis and interpreted results. X.Y.T. and X.P.Z. revised the manuscript and had full access to all data in the study and take responsibility for the integrity of the data and the accuracy of data analysis.

## Abbreviations

CI, confidence interval; MTHFR, methylenetetrahydrofolate reductase; NOS, Newcastle–Ottawa Scale; OR, odds ratio; pHWE, *P* values for Hardy–Weinberg equilibrium test; PRISMA, Preferred Items for Systematic Reviews and Meta-analysis; VTE, venous thromboembolism.

## References

- Schulman, S., Ageno, W. and Konstantinides, S.V. (2017) Venous thromboembolism: Past, present and future. *Thromb. Haemost.* **117**, 1219–1229
- Kuderer, N.M., Poniewierski, M.S., Culakova, E., Lyman, G.H., Khorana, A.A., Pabinger, I. et al. (2018) Predictors of Venous Thromboembolism and Early Mortality in Lung Cancer: Results from a Global Prospective Study (CANTARISK). *Oncologist* **23**, 247–255, <https://doi.org/10.1634/theoncologist.2017-0205>
- Hotoleanu, C. (2017) Genetic Risk Factors in Venous Thromboembolism. *Adv. Exp. Med. Biol.* **906**, 253–272, [https://doi.org/10.1007/5584\\_2016\\_120](https://doi.org/10.1007/5584_2016_120)
- Abudurehman, K., Mahemuti, A., Xia, Y.N. and Hu, X.M. (2012) Association between gene polymorphisms of methylenetetrahydrofolate reductase and plasma homocysteine in Uygur patients with venous thromboembolism. *Zhonghua Xin Xue Guan Bing Za Zhi* **40**, 1030–1036
- He, J.A., Hu, X.H., Fan, Y.Y., Yang, J., Zhang, Z.S., Liu, C.W. et al. (2010) Hyperhomocysteinemia, low folate concentrations and methylene tetrahydrofolate reductase C677T mutation in acute mesenteric venous thrombosis. *Eur. J. Vasc. Endovasc. Surg.* **39**, 508–513, <https://doi.org/10.1016/j.ejvs.2009.09.014>
- Ioannidis, J.P., Patsopoulos, N.A. and Evangelou, E. (2007) Heterogeneity in meta-analyses of genome-wide association investigations. *PLoS ONE* **2**, e841, <https://doi.org/10.1371/journal.pone.0000841>
- Ben Salem-Berrabah, O., Fekih-Mrissa, N., N'Siri, B., Ben Hamida, A., Benammar-Elgaaid, A., Gritli, N. et al. (2012) Thrombophilic polymorphisms - factor V Leiden G1691A, prothrombin G20210A and MTHFR C677T - in Tunisian patients with cerebral venous thrombosis. *J. Clin. Neurosci.* **19**, 1326–1327, <https://doi.org/10.1016/j.jocn.2011.11.029>
- Dong, N., Wang, B., Chu, L. and Xiao, L. (2013) Plasma homocysteine concentrations in the acute phase after central retinal vein occlusion in a Chinese population. *Curr. Eye Res.* **38**, 1153–1158, <https://doi.org/10.3109/02713683.2013.809124>
- Gao, W., Wang, Y.S., Zhang, P. and Wang, H.Y. (2008) MTHFR C677T mutation in central retinal vein occlusion: a case-control study in Chinese population. *Thromb. Res.* **121**, 699–703, <https://doi.org/10.1016/j.thromres.2007.05.026>
- Seinost, G., Renner, W., Brodmann, M. and Winkler, M. (2000) C677T Mutation in the Methylene Tetrahydrofolate Reductase Gene as a Risk Factor for Venous Thrombotic Disease in Austrian Patients. *Thromb. Res.* **100**, 405–407, [https://doi.org/10.1016/S0049-3848\(00\)00341-8](https://doi.org/10.1016/S0049-3848(00)00341-8)
- Guo, C., Guo, Q., Gong, Y. and Bingxi, C. (2002) The C677T mutation in the methylenetetrahydrofolate reductase gene and its association with deep vein thrombophilia in Shandong Hans. *Chin. J. Med. Genet.* **19**, 295–297
- Hanson, N.Q., Aras, O., Yang, F. and Tsai, M.Y. (2001) C677T and A1298C polymorphisms of the methylenetetrahydrofolate reductase gene: incidence and effect of combined genotypes on plasma fasting and post-methionine load homocysteine in vascular disease. *Clin. Chem.* **47**, 661–666, <https://doi.org/10.1093/clinchem/47.4.661>
- Hsu, L.-A., Ko, Y.-L., Wang, S.-M. and Chang, C.-J. (2001) The C677T Mutation of the Methylenetetrahydrofolate Reductase Gene Is Not Associated with the Risk of Coronary Artery Disease or Venous Thrombosis among Chinese in Taiwan. *Hum. Hered.* **51**, 41–45, <https://doi.org/10.1159/000022958>

- 14 Hsu, T.S., Hsu, L.A., Chang, C.J., Sun, C.F. and Ko, Y.L. (2001) Importance of hyperhomocysteinemia as a risk factor for venous thromboembolism in a Taiwanese population. A case-control study. *Thromb. Res.* **102**, 387–395, [https://doi.org/10.1016/S0049-3848\(01\)00262-6](https://doi.org/10.1016/S0049-3848(01)00262-6)
- 15 Spiroski, I., Kedev, S., Antov, S., Arsov, T., Krstevska, M., Dzhekova-Stojkova, S. et al. (2008) Methylenetetrahydrofolate reductase (MTHFR-677 and MTHFR-1298) genotypes and haplotypes and plasma homocysteine levels in patients with occlusive artery disease and deep venous thrombosis. *Acta Biochim. Pol.* **55**, 587–594, <https://doi.org/10.18388/abp.2008.3065>
- 16 Bezemer, I.D., Doggen, C.J.M., Vos, H.L. and Rosendaal, F.R. (2007) No Association Between the Common MTHFR 677C→T Polymorphism and Venous Thrombosis. *Arch. Intern. Med.* **167**, 497–501, <https://doi.org/10.1001/archinte.167.5.497>
- 17 Jang, M.J., Jeon, Y.J., Choi, W.I., Choi, Y.S., Kim, S.Y., Chong, S.Y. et al. (2013) The 677C→T mutation of the MTHFR gene increases the risk of venous thromboembolism in Koreans and a meta-analysis from Asian population. *Clin. Appl. Thromb. Hemost.* **19**, 309–314
- 18 Xu, J., Li, K. and Zhou, W. (2019) Relationship between genetic polymorphism of MTHFR C677T and lower extremities deep venous thrombosis. *Hematology* **24**, 108–111, <https://doi.org/10.1080/10245332.2018.1526440>
- 19 Karmadonova, N.A., Shilova, A.N., Kozyreva, V.S., Subbotovskaya, A.I., Klevanets, J.E. and Karpenko, A.A. (2015) Association of folate metabolism gene polymorphisms and pulmonary embolism: A case-control study of West-Siberian population. *Thromb. Res.* **135**, 788–795, <https://doi.org/10.1016/j.thromres.2014.11.021>
- 20 Kupeli, E., Verdi, H., Simsek, A., Atac, F.B. and Eyuboglu, F.O. (2011) Genetic mutations in Turkish population with pulmonary embolism and deep venous thrombosis. *Clin. Appl. Thromb. Hemost.* **17**, E87–E94, <https://doi.org/10.1177/1076029610385224>
- 21 Li, Z., Yadav, U., Mahemuti, A., Tang, B.-P. and Upur, H. (2015) Association of MTHFR genetic polymorphisms with venous thromboembolism in Uyghur population in Xinjiang, China. *Int. J. Clin. Exp. Med.* **8**, 17703–17711
- 22 Lin, J.S., Shen, M.C., Tsai, W. and Bodo, L. (2000) The prevalence of C677T mutation in the methylenetetrahydrofolate reductase gene and its association with venous thrombophilia in Taiwanese Chinese. *Thromb. Res.* **97**, 89–94, [https://doi.org/10.1016/S0049-3848\(99\)00160-7](https://doi.org/10.1016/S0049-3848(99)00160-7)
- 23 Ling, Q., Shengkai, Y. and Yaohong, S. (2002) Methylenetetrahydrofolate reductase gene polymorphism and deep-vein thrombosis. *Chin. J. Lab. Med.* **25**, 200–204
- 24 Lu, Y., Zhao, Y., Liu, G., Wang, X., Liu, Z., Chen, B. et al. (2002) Factor V gene G1691A mutation, prothrombin gene G20210A mutation, and MTHFR gene C677T mutation are not risk factors for pulmonary thromboembolism in Chinese population. *Thromb. Res.* **106**, 7–12, [https://doi.org/10.1016/S0049-3848\(02\)00064-6](https://doi.org/10.1016/S0049-3848(02)00064-6)
- 25 Lupi-Herrera, E., Soto-Lopez, M.E., Lugo-Dimas, A.J., Nunez-Martinez, M.E., Gamboa, R., Huesca-Gomez, C. et al. (2019) Polymorphisms C677T and A1298C of MTHFR Gene: Homocysteine Levels and Prothrombotic Biomarkers in Coronary and Pulmonary Thromboembolic Disease. *Clin. Appl. Thromb. Hemost.* **25**, 1076029618780344, <https://doi.org/10.1177/1076029618780344>
- 26 Martine, A.G., Arnaud, E., Nicaud, V., Aubry, M.L., Fiessinger, J.N., Aiach, M. et al. (1999) Venous thromboembolic disease and the prothrombin, methylene tetrahydrofolate reductase and factor V genes. *Thromb. Haemost.* **81**, 506–510
- 27 Meitang, W., Qiang, L. and Lai, H.F. (2004) Relationship of plasma homocysteine and folio acid levels and 510-methylenetetrahydrofolate reductase gene mutation th venous thromboembolism. *Chin. J. Intern. Med.* **43**, 591–595
- 28 Keijzer, M.B.A.J., den Heijer, M., Blom, H.J., Bos, G.M.J., Willems, H.P.J., Gerrits, W.B.J. et al. (2002) Interaction Between Hyperhomocysteinemia, Mutated Methylenetetrahydrofolatereductase (MTHFR) and Inherited Thrombophilic Factors in Recurrent Venous Thrombosis. *Thromb. Haemost.* **88**, 723–728, <https://doi.org/10.1055/s-0037-1613292>
- 29 Isotalo, P.A., Donnelly, J.G. and FCACB (2000) Prevalence of Methylenetetrahydrofolate Reductase Mutations in Patients With Venous Thrombosis. *Mol. Diagn.* **4**, 59–66, <https://doi.org/10.2165/00066982-200005010-00013>
- 30 Ray, J.G., Langman, L.J., Vermeulen, M.J., Evrovski, J., Yeo, E.L. and Cole, D.E. (2001) Genetics University of Toronto Thrombophilia Study in Women (GUTTSI): genetic and other risk factors for venous thromboembolism in women. *Curr. Control. Trials Cardiovasc. Med.* **2**, 141–149, <https://doi.org/10.1186/CVM-2-3-141>
- 31 Tawfik, N.M., Deeb, M.E. and Nasr, A.S. (2012) Role of soluble P-selectin and methylenetetrahydrofolate reductase gene polymorphisms (677C>T) in Egyptian patients with venous thromboembolism. *Blood Coagul. Fibrinolysis* **23**, 537–542
- 32 Vaya, A., Plume, G., Bonet, E., Carrasco, P. and Morales-Suarez-Varela, M.M. (2011) Hyperhomocysteinemia and the methylene tetrahydrofolate reductase C677T mutation in splanchnic vein thrombosis. *Eur. J. Haematol.* **86**, 167–172, <https://doi.org/10.1111/j.1600-0609.2010.01551.x>
- 33 Almawi, W.Y., Tamim, H., Kreidy, R., Timson, G., Rahal, E., Nabulsi, M. et al. (2005) A Case Control Study on the Contribution of Factor V-Leiden, Prothrombin G20210A, and MTHFR C677T Mutations to the Genetic Susceptibility of Deep Venous Thrombosis. *J. Thromb. Thrombolysis* **19**, 189–196, <https://doi.org/10.1007/s11239-005-1313-x>
- 34 Yin, G., Yan, L., Zhang, Z., Chen, K. and Jin, X. (2012) C677T methylenetetrahydrofolate reductase gene polymorphism as a risk factor involved in venous thromboembolism: a population-based case-control study. *Mol. Med. Rep.* **6**, 1271–1275, <https://doi.org/10.3892/mmr.2012.1086>
- 35 Zalavras, C.H.G., Giotopoulou, S., Dokou, E., Mitsis, M. and Ioannou, H.V. (2002) Lack of association between the C677T mutation in the 5,10-methylenetetrahydrofolate reductase gene and venous thromboembolism in Northwestern Greece. *Int. Angiol.* **21**, 268–271
- 36 Zheng, Y.Z., Tong, J., Do, X.P., Pu, X.Q. and Zhou, B.T. (2000) Prevalence of methylenetetrahydrofolate reductase C677T and its association with arterial and venous thrombosis in the Chinese population. *Br. J. Haematol.* **109**, 870–874, <https://doi.org/10.1046/j.1365-2141.2000.02112.x>
- 37 Liew, S.C. and Gupta, E.D. (2015) Methylenetetrahydrofolate reductase (MTHFR) C677T polymorphism: epidemiology, metabolism and the associated diseases. *Eur. J. Med. Genet* **58**, 1–10, <https://doi.org/10.1016/j.ejmg.2014.10.004>
- 38 Xu, A., Wang, W. and Jiang, X. (2018) The roles of MTRR and MTHFR gene polymorphisms in congenital heart diseases: a meta-analysis. *Biosci. Rep.* **38**, <https://doi.org/10.1042/BSR20181160>
- 39 Luo, Z., Lu, Z., Muhammad, I., Chen, Y., Chen, Q., Zhang, J. et al. (2018) Associations of the MTHFR rs1801133 polymorphism with coronary artery disease and lipid levels: a systematic review and updated meta-analysis. *Lipids Health Dis.* **17**, 191, <https://doi.org/10.1186/s12944-018-0837-y>

- 40 Huang, Y.C., Lai, I.W. and Chang, H.C. (2019) The Association of MTHFR C677T and MTR A2756G Gene Polymorphisms With the Risk of Systemic Lupus Erythematosus: A Systematic Review and Meta-analysis. *J. Clin. Rheumatol.* **1**–3, <https://doi.org/10.1097/RHU.0000000000001240>
- 41 Nie, F., Yu, M., Zhang, K. and Yang, L. (2020) Association of MTHFR gene polymorphisms with pancreatic cancer: meta-analysis of 17 case-control studies. *Int. J. Clin. Oncol.* **25**, 312–321, <https://doi.org/10.1007/s10147-019-01571-2>
- 42 Liew, S.C. and Gupta, E.D. (2015) Methylenetetrahydrofolate reductase (MTHFR) C677T polymorphism: epidemiology, metabolism and the associated diseases. *Eur. J. Med. Genet.* **58**, 1–10, <https://doi.org/10.1016/j.ejmg.2014.10.004>
- 43 Zhang, P., Gao, X., Zhang, Y., Hu, Y. and Ma, H. (2015) Association between MTHFR C677T polymorphism and venous thromboembolism risk in the Chinese population: a meta-analysis of 24 case-controlled studies. *Angiology* **66**, 422–432, <https://doi.org/10.1177/0003319714546368>
- 44 Den Heijer, M., Lewington, S. and Clarke, R. (2005) Homocysteine, MTHFR and risk of venous thrombosis: a meta-analysis of published epidemiological studies. *J. Thromb. Haemost.* **3**, 292–299, <https://doi.org/10.1111/j.1538-7836.2005.01141.x>
- 45 Shahzad, K., Hai, A., Ahmed, A., Kizilbash, N. and Jamal, A. (2013) A Structured-based Model for the Decreased Activity of Ala222Val and Glu429Ala Methylenetetrahydrofolate Reductase (MTHFR) Mutants. *Bioinformation* **9**, 929–936, <https://doi.org/10.6026/97320630009929>
- 46 Liu, S., Wu, Y., Liu, X., Zhou, J., Wang, Z., He, Z. et al. (2017) Lack of association between MTHFR A1298C variant and Alzheimer's disease: evidence from a systematic review and cumulative meta-analysis. *Neurol. Res.* **39**, 426–434, <https://doi.org/10.1080/01616412.2017.1297340>
- 47 Zhang, X.D., Li, Y.T., Yang, S.Y. and Li, W. (2013) Meta-analysis on MTHFR polymorphism and lung cancer susceptibility in East Asian populations. *Biomed. Rep.* **1**, 440–446, <https://doi.org/10.3892/br.2013.68>
